# Supplementary material for: Curved colloidal crystals of discoids at near-critical liquid–liquid interface
Source: Royal Society of Chemistry journal article supplement (doi:10.1039/d1sm00765c), 2021-01-01
Supplement: d1sm00765c4.pdf [file d1sm00765c4.pdf]

**Supporting information**

**Curved Colloidal Crystals of Discoids at near-Critical Liquid-Liquid Interface**

Ashis Mukhopadhyay

*Department of Physics, Wayne State University, Detroit, MI 48201*

**SI1:** Confocal microscopy image of bottom coverslip showing rings after crossing the phase-boundary. The scale bar is 20  $\mu\text{m}$ .

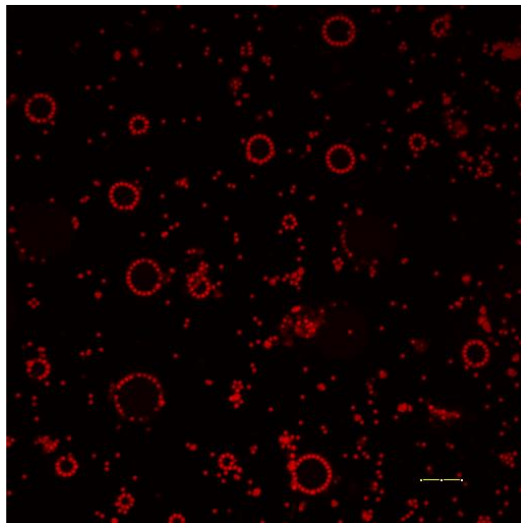

Supporting Movie 1: This movie has been referred as ESI Movie 1 in the main text and has the file name Movie1. It showed the destruction of the domes by a quench from two-phase to one-phase region.

Supporting Movie 2: This movie has been referred as ESI Movie 2 in the main text and has the file name Movie2. It showed the confocal z-scan of one dome.

Supporting Movie 3: This movie has been referred as ESI Movie 3 in the main text and has the file name Movie3. It showed the panoramic view of one dome.
